# Supplementary material for: Slipins: ancient origin, duplication and diversification of the stomatin protein family
Source: PubMed Central journal article supplement (PMC2258279; doi:10.1186/1471-2148-8-44), 2008-02-11

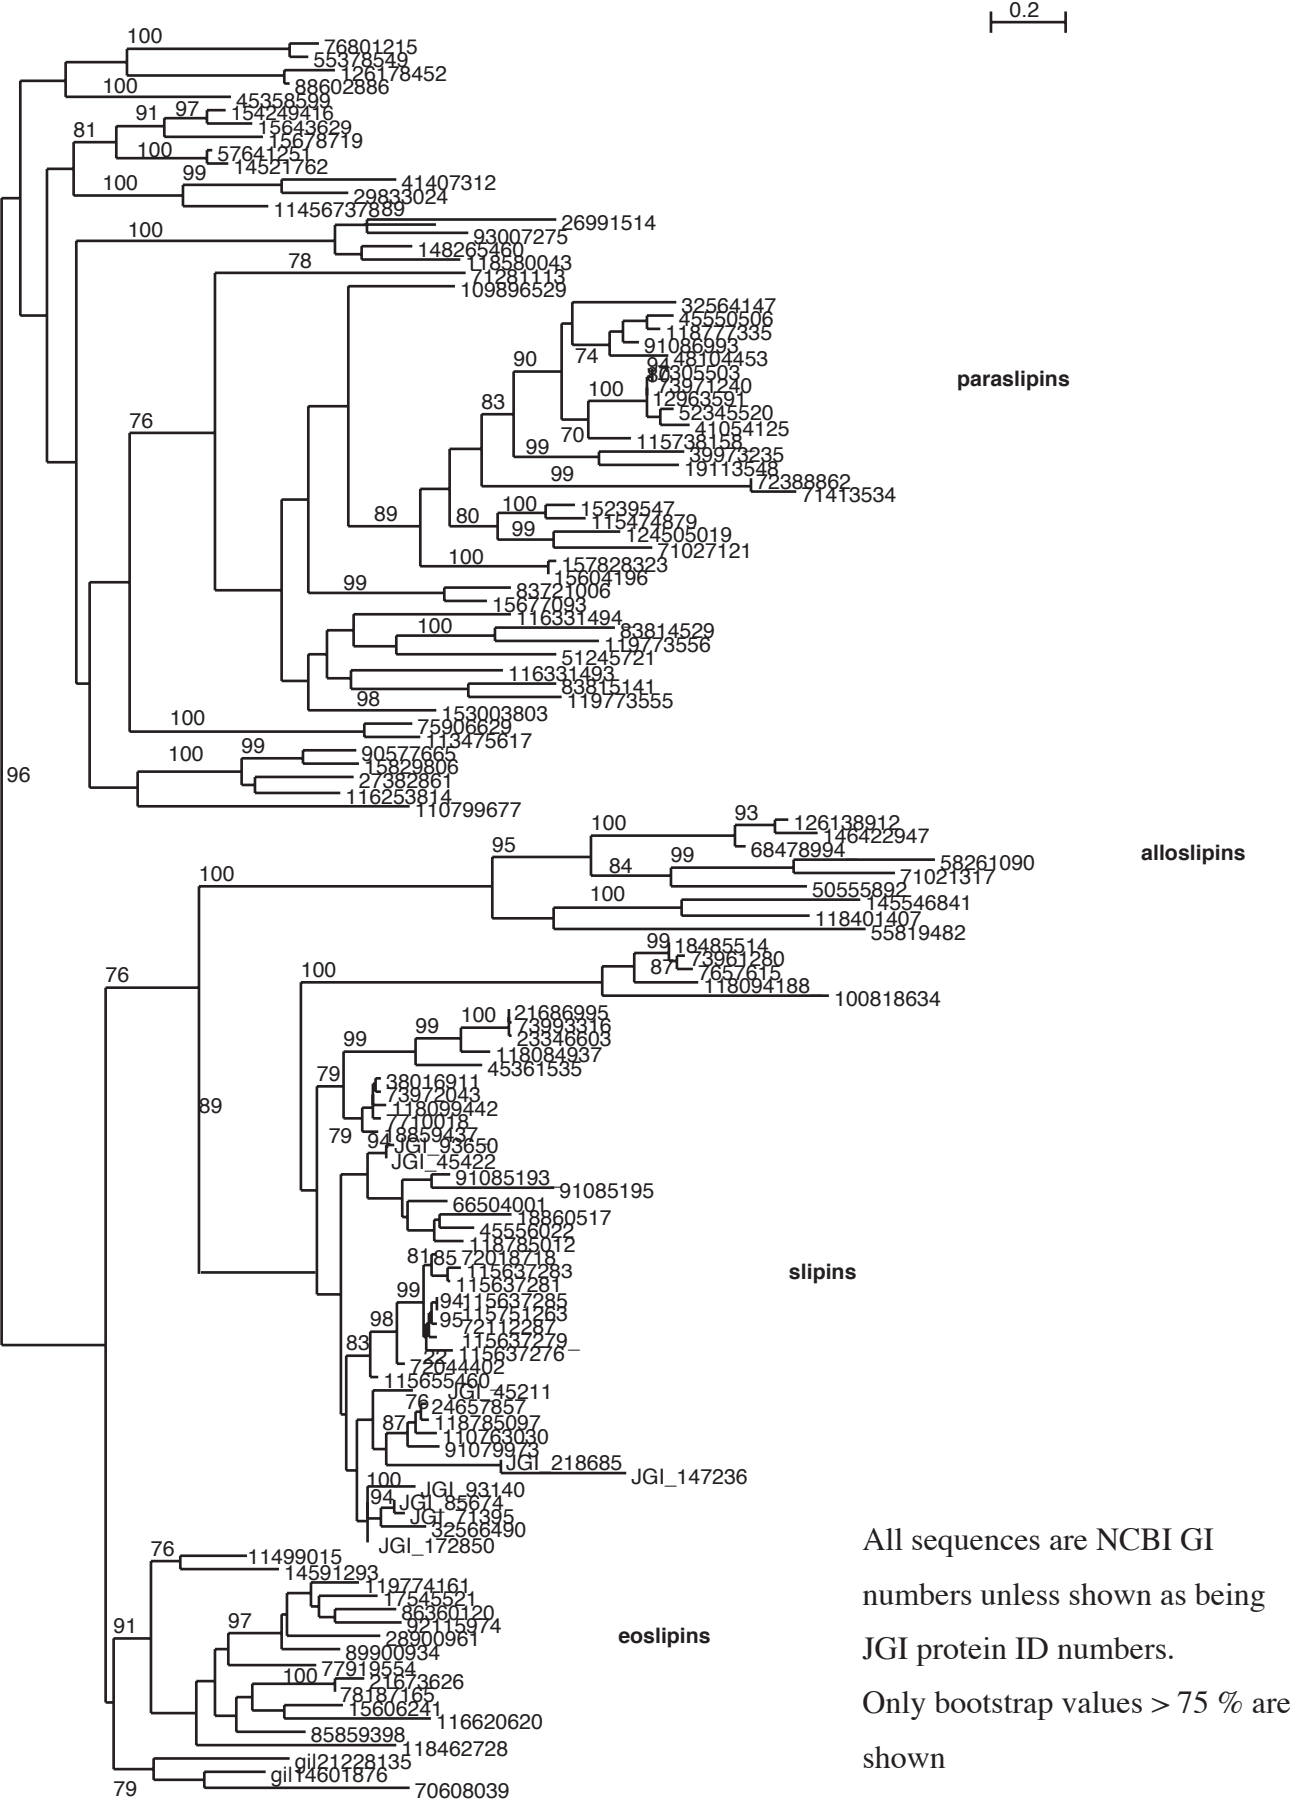

Supplement: 1471-2148-8-44-S1.pdf [file 1471-2148-8-44-S1.pdf]
